# Supplementary material for: Study on graphene oxide as a hole extraction layer for stable organic solar cells
Source: Royal Society of Chemistry journal article supplement (doi:10.1039/d1ra02452c), 2021-01-01
Supplement: d1ra02452c1.pdf [file d1ra02452c1.pdf]

**Supporting Information for:**

**Study on graphene oxide as a hole extraction layer for stable organic solar cells**

Jaehoon Kim,<sup>a</sup> Ashis Kumar Sarker,<sup>b</sup> Yeseul Park,<sup>a</sup> Jeonghun Kwak,<sup>a</sup> Hyung-Jun Song\*<sup>c</sup> and Changhee Lee\*<sup>a</sup>

<sup>a</sup> Department of Electrical and Computer Engineering, Seoul National University, Seoul 08826, Republic of Korea. E-mail: [chlee7@snu.ac.kr](mailto:chlee7@snu.ac.kr)

<sup>b</sup> Department of Chemistry, Mawlana Bhashani Science and Technology University, Tangail-1902, Bangladesh.

<sup>c</sup> Department of Safety Engineering, Seoul National University of Science and Technology, Seoul, 01811, Republic of Korea. E-mail: [hj.song@seoultech.ac.kr](mailto:hj.song@seoultech.ac.kr)

**Table S1** Raman peak positions and full widths at half-maximum (FWHM) of graphene and GO.

|          | Peak (cm <sup>-1</sup> ) |        | FWHM (cm <sup>-1</sup> ) |        | Relative intensity (I <sub>D</sub> /I <sub>G</sub> ) |
|----------|--------------------------|--------|--------------------------|--------|------------------------------------------------------|
|          | D band                   | G band | D band                   | G band |                                                      |
| GO       | 1350                     | 1600   | 140                      | 110    | 1.037                                                |
| Graphene | 1350                     | 1590   | 100                      | 100    | 0.985                                                |

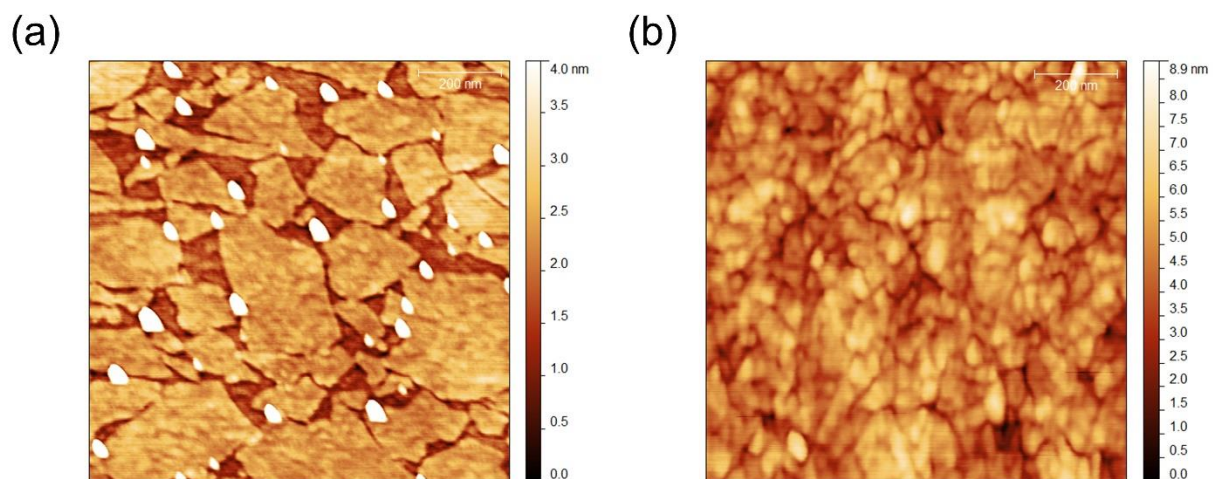

**Fig. S1** Topography images of GO flakes within a GO film spin coated from (a) 1 mg·mL<sup>-1</sup> and (b) 5 mg·mL<sup>-1</sup> by atomic force microscopy (AFM).

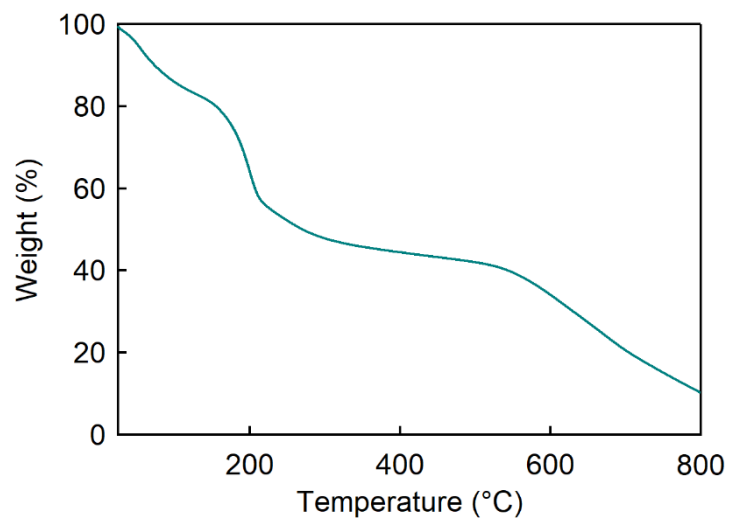

**Fig. S2** Thermogravimetric analysis (TGA) of graphene oxide (GO).

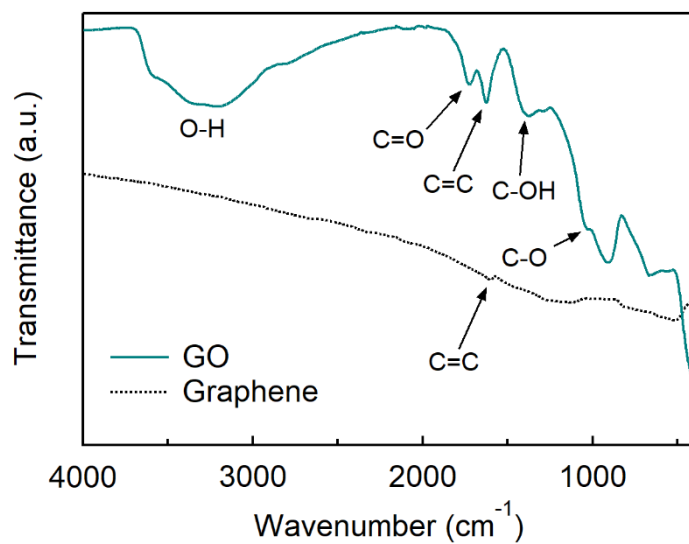

**Fig. S3** Fourier-transform infrared spectroscopy (FTIR) of graphene oxide (GO).

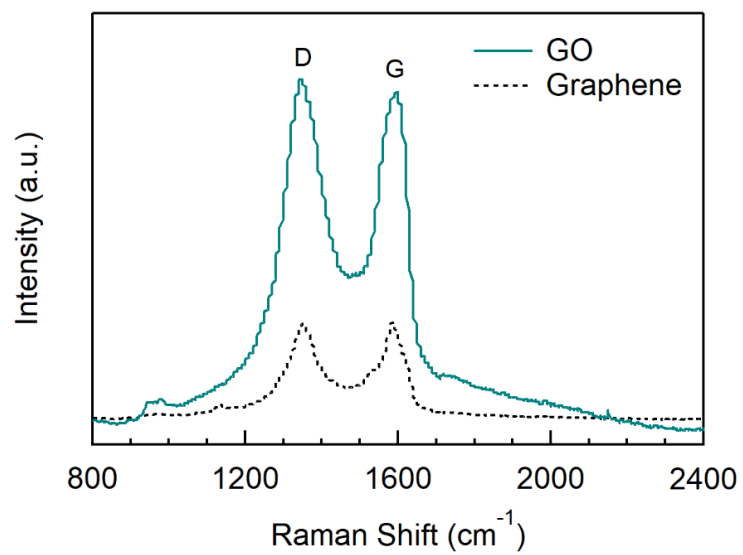

**Fig. S4** Raman spectroscopy analysis of graphene and graphene oxide (GO).

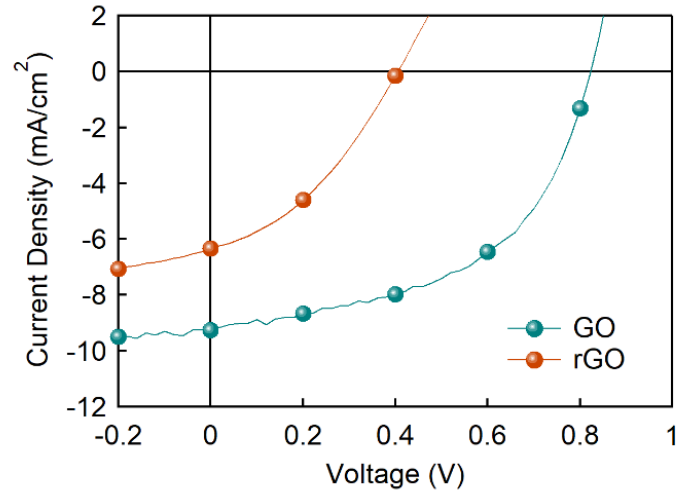

**Fig. S5** Current density-voltage ( $J$ - $V$ ) characteristics of OSCs with GO and reduced GO (rGO), where rGO is obtained through thermal annealing the GO film at 500°C.

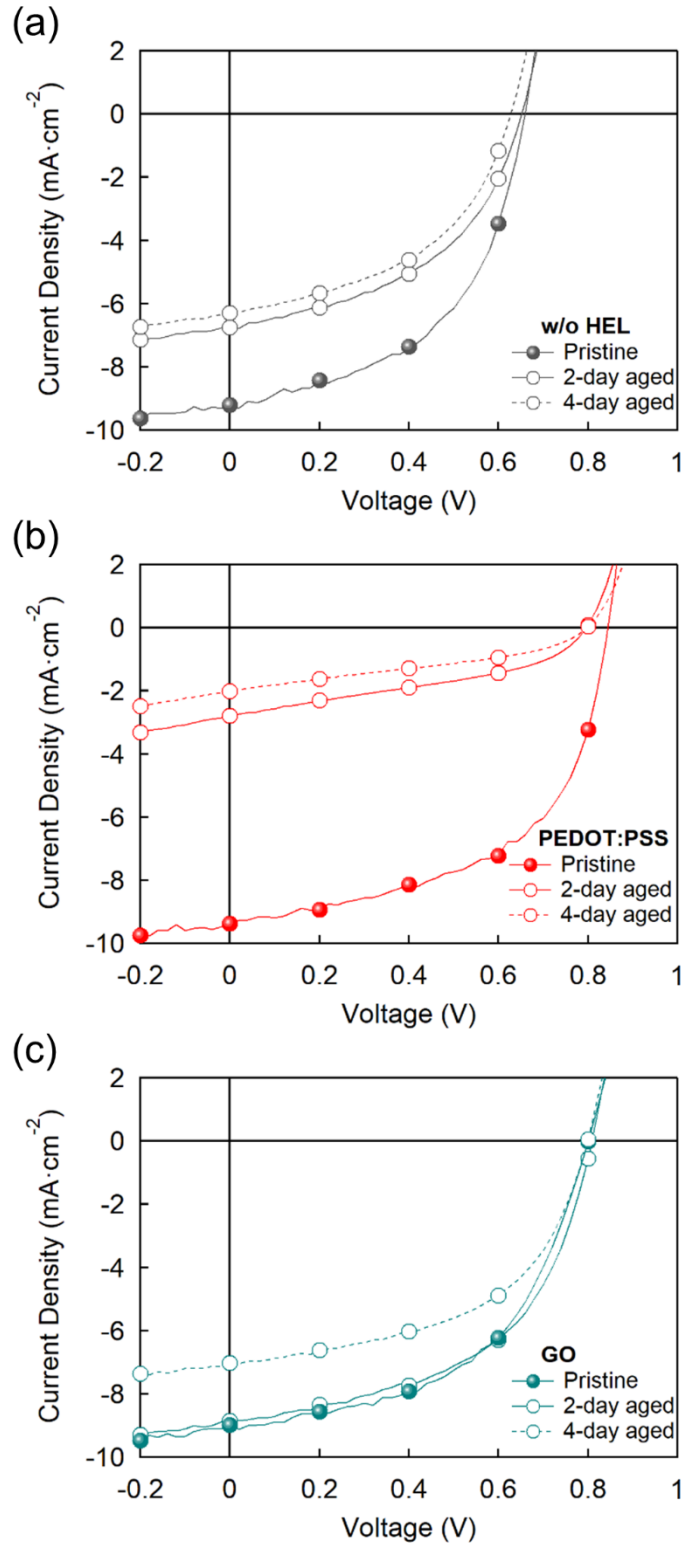

**Fig. S6** Variation of  $J$ - $V$  characteristics of devices upon 4-day aging.



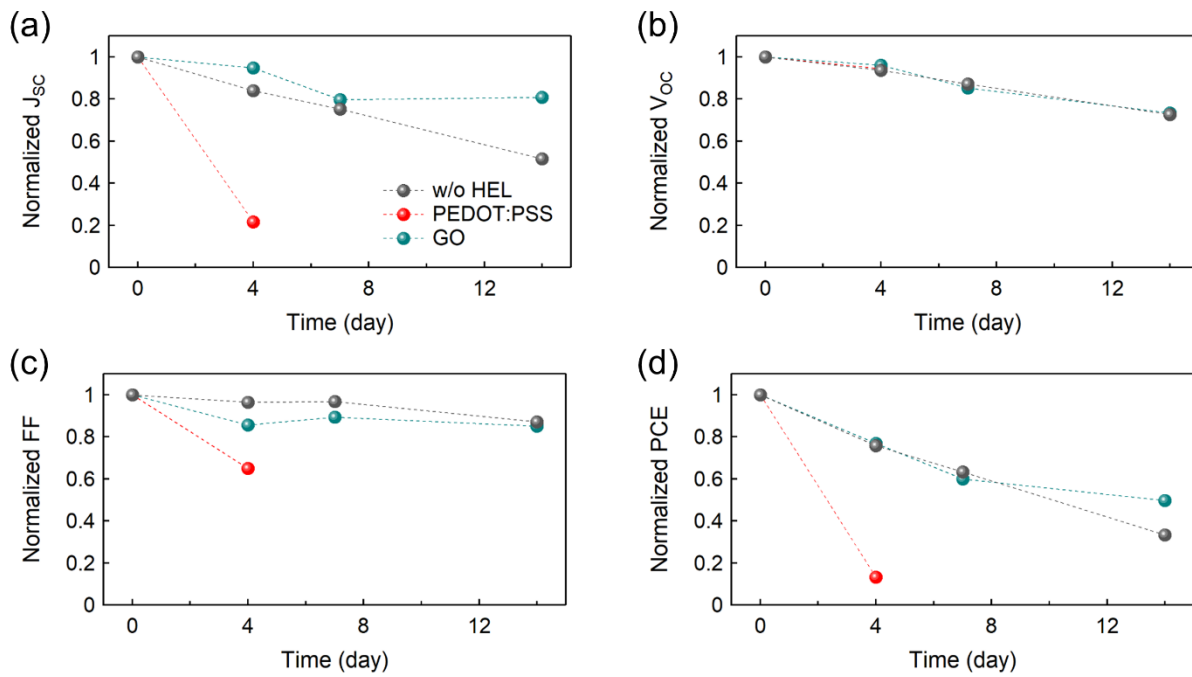

**Fig. S7** Variation of photovoltaic parameters ( $J_{sc}$ ,  $V_{oc}$ , FF, PCE) of devices upon 2-week aging.

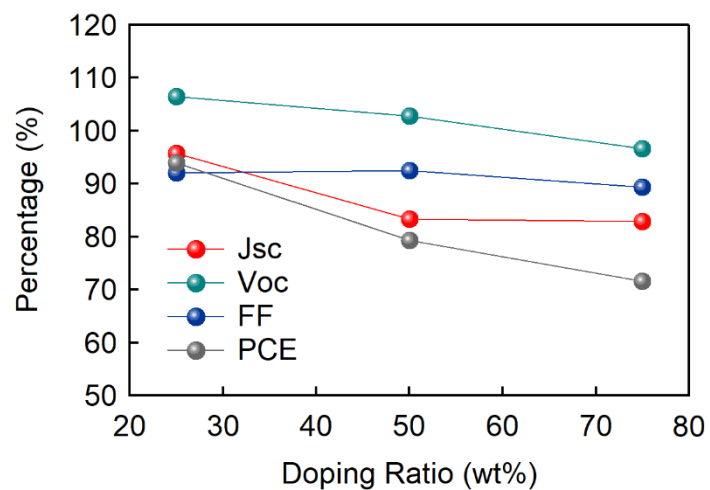

**Fig. S8** Normalized values of photovoltaic parameters of devices with composite HIL as a function of the GO doping ratio from 25 wt% to 75 wt% compared to pristine PEDOT:PSS.
